# Supplementary material for: The association between a deep-sea gastropod Pedicularia sicula (Caenogastropoda: Pediculariidae) and its coral host Errina dabneyi (Hydrozoa: Stylasteridae) in the Azores
Source: Oxford University Press journal article supplement (doi:10.1093/icesjms/fsq066), 2010-06-30
Supplement: fsq066supp.pdf [file fsq066supp.pdf]

Table S1. Details of the material examined in this study. The material is deposited in the collection of the Department of Oceanography and Fisheries of the University of the Azores (Faial Island, Azores, Portugal) (reference numbers: DOP-UAz). Most material was collected from stylasterid hosts by A. Braga-Henriques. Specimens used for SEM photos are deposited at the DBUA (São Miguel Island, Azores, Portugal) under reference number DBUA Sup 191 (5 specimens), Sup 222 (1), Sup 223 (1) and Sup 224 (2).

### **Material examined**

Açor Bank1, 38°04'12"N 29°04'12"W, 293-366m, 15-Nov-2003, 4 sedentary adults (DOP-3386 and DOP-3538), on two *Errina dabneyi* (Pourtalès, 1871); Açor Bank2, 38°10'24"N 28°56'36"W, 512m, 6-Nov-2006, 7 specimens (2 sedentary adults and 5 juveniles, DOP-1114), on one *Errina dabneyi* (Pourtalès, 1871); Açor Bank3, 38°04'48"N 28°02'24"W, 402m, 7-Nov-2006, 18 specimens (14 sedentary adults and 4 juveniles, DOP-987 and DOP-1107), on two *Errina dabneyi* (Pourtalès, 1871); Açor Bank4, 38°06'32"N 29°09'50"W, 201m, 16-Mar-2007, 7 sedentary adults (DOP-1293, DOP-1297, DOP-1309 and DOP-3534), on four *Errina dabneyi* (Pourtalès, 1871); Açor Bank5, 38°09'25"N 29°01'33"W, 307m, 23-Mar-2007, 4 sedentary adults (DOP-1345) on one *Errina dabneyi* (Pourtalès, 1871); Açor Bank6, 38°13'24"N 28°59'42"W, 402m, 28-Mar-2007, 5 sedentary adults (DOP-1408), on one *Errina dabneyi* (Pourtalès, 1871) and 13-Jun-2007, 6 sedentary adults (DOP-2477) on one *Errina dabneyi* (Pourtalès, 1871); Açor Bank7 (35 Miles), 37°54'00"N 29°05'24"W, 249m, 16-Set-2006, 3 sedentary adults (DOP-3043 and DOP-3530) on two *Errina dabneyi* (Pourtalès, 1871); Açor Bank8 (35Miles), 38°07'01"N 29°10'48"W, 549m, 09-Dez-2006, 9 sedentary adults (DOP-3531

and DOP-3532), on two *Errina dabneyi* (Pourtalès, 1871); Açor Bank9 (35Miles), 37°58'06"N 29°03'28"W, 229m, 02-Jun-2008, 3 sedentary adults (DOP-2564), on one *Errina dabneyi* (Pourtalès, 1871); Gigante, 38°59'00"N 29°53'00"W, 249m, 26-May-2007, 1 sedimentary adult (DOP-1921), on one *Errina dabneyi* (Pourtalès, 1871); Princesse Alice Bank1, 37°54'00"N 29°03'28"W, 329m, no data, 7 sedentary adults (DOP-3539), on one *Errina dabneyi* (Pourtalès, 1871); Princesse Alice Bank2, 37°53'18"N 28°41'28"W, 256-274m, 18-Jan-2007, 2 sedentary adults (DOP-848), on one *Errina dabneyi* (Pourtalès, 1871); Princesse Alice Bank3, 37°57'24"N 29°12'48"W, 201m, 26-Mar-2007, 13 sedentary adults (DOP-1370, DOP-1373 and DOP-3535), on three *Errina dabneyi* (Pourtalès, 1871); Princesse Alice Bank4, 37°56'42"N 29°10'36"W, 201m, 30-Mar-2007, 11 sedentary adults (DOP-1442, DOP-3383, DOP-3536 and DOP-3537), on four *Errina dabneyi* (Pourtalès, 1871); Princesse Alice Bank5, 38°00'N 29°21'00"W, 263m, 17-May-2008, 3 sedentary adults (DOP-3270), on one *Errina dabneyi* (Pourtalès, 1871); Rosais, São Jorge Island, 38°46'30"N 28°29'54"W, 347m, 25-Fev-2007, 4 sedentary adults (DOP-1127 and DOP-3533), on two *Errina dabneyi* (Pourtalès, 1871).
